# Supplementary material for: Consensus guidelines for the safe prescription and administration of oral bowel-cleansing agents
Source: HighWire-hosted journal article supplement (doi:10.1136/gutjnl-2011-300861), 2012-07-26
Supplement: gutjnl-2011-300861-s2.pdf [file gutjnl-2011-300861-s2.pdf]

**APPENDIX 5: ORAL BOWEL CLEANSING AGENT PRESCRIPTION CHECKLIST**

**NAME** .....

**HOSPITAL NO.** .....

**Date of Birth** .....

**ORAL BOWEL CLEANSING AGENT PRESCRIPTION CHECKLIST**  
 This checklist is to be completed by the clinician authorising the oral bowel cleansing agent and should then be filed in the patient's medical records.

**STEP 1: ABSOLUTE CONTRAINDICATIONS**

|                                      |       |
|--------------------------------------|-------|
| GI Obstruction, ileus or perforation | Y / N |
| Severe IBD                           | Y / N |
| Toxic megacolon                      | Y / N |
| Reduced conscious level              | Y / N |
| Hypersensitivity to any ingredients  | Y / N |
| Dysphagia (unless via NGT)           | Y / N |
| Ileostomy                            | Y / N |

↓  
 If yes to any question, do not continue.

**STEP 2: REVIEW ANY BLOOD RESULTS**  
 (Should be checked in patients with comorbidities)

|      |       |                    |
|------|-------|--------------------|
| Na   | ..... | eGFR 30-60 = CKD 3 |
| K    | ..... | eGFR 15-29 = CKD 4 |
| eGFR | ..... | eGFR 0-14 = CKD 5  |

↓

**STEP 3: Review MEDICATIONS**

|           |     |                          |     |
|-----------|-----|--------------------------|-----|
| ACEi/ARB  | Y/N | Safe to stop for 72 hrs? | Y/N |
| Diuretics | Y/N | Safe to stop for 24 hrs? | Y/N |
| NSAIDs    | Y/N | Safe to stop for 72 hrs? | Y/N |

**STEP 4: CONSIDER CO-MORBIDITIES & RISK FACTORS**

| Comorbidities                | Optimal                      | Acceptable           | Avoid         |
|------------------------------|------------------------------|----------------------|---------------|
| <b>Kidney Disease</b>        |                              |                      |               |
| CKD 3                        | PEG / Pico / CF / Citramag   |                      | OSP           |
| CKD 4                        | PEG (if fluid status allows) | Pico /CF / Citramag  | OSP           |
| CKD 5                        | PEG (if fluid status allows) | Pico / CF            | OSP, Citramag |
| Haemodialysis                | Discuss with nephrologist    |                      |               |
| Peritoneal dialysis          | Discuss with nephrologist    |                      |               |
| Renal Transplant             | Discuss with nephrologist    |                      |               |
| <b>Electrolyte Imbalance</b> | PEG                          | Pico / CF / Citramag | OSP           |
| <b>Cardiac Failure</b>       | PEG                          | Pico / CF / Citramag | OSP           |
| <b>Liver Cirrhosis</b>       | PEG                          | Pico / CF            | OSP           |
| <b>Hypertension</b>          | PEG / Pico / CF / Citramag   |                      | OSP           |

**STEP 5: TYPE OF BOWEL PREP ISSUED?**

Picolax / Citrafleet/ Citramag / Klean Prep / Moviprep / Fleet Phospho-soda

**STEP 6: INSTRUCTIONS PROVIDED TO THE PATIENT**

Verbally Y/N  
 Leaflet Y/N

**STEP 7: OTHER COMMENTS**

↓

**STEP 8: SIGNATURE** .....

KEY    **ACEi** Angiotensin converting enzyme inhibitors, **ARB** Angiotensin II Receptor Blockers, **CKD** chronic kidney disease,  
**OSP** oral sodium phosphate preparations (Fleet Phospho-soda), **PEG** polyethylene glycol (Klean Prep, Moviprep, Pico Picolax, CF Citrafleet)
